# Supplementary material
Source: MDPI journal article supplement (https://www.mdpi.com/2571-8789/5/2/31)
Supplement: s1 [file s1]

## Article

# No-Till and Solid Digestate Amendment Selectively Affect the Potential Denitrification Activity in Two Mediterranean Orchard Soils

Michele Monti <sup>†</sup>, Giuseppe Badagliacca <sup>\*,†</sup>, Maurizio Romeo and Antonio Gelsomino

Agraria Department, Mediterranean University of Reggio Calabria, Feo di Vito, 89124 Reggio Calabria, Italy; montim@unirc.it (M.M.); maurizio.romeo@unirc.it (M.R.); agelsomino@unirc.it (A.G.)

\* Correspondence: giuseppe.badagliacca@unirc.it

<sup>†</sup> Co-first author, these authors contributed equally to this work.

**Citation:** Monti, M.; Badagliacca, G.; Romeo, M.; Gelsomino, A. No-Till and Solid Digestate Amendment Selectively Affect the Potential Denitrification Activity in Two Mediterranean Orchard Soils. *Soil Syst.* **2021**, *5*, 31. <https://doi.org/10.3390/soilsystems5020031>

Academic Editor: Heike Knicker

Received: 13 April 2021

Accepted: 19 May 2021

Published: 21 May 2021

**Publisher's Note:** MDPI stays neutral with regard to jurisdictional claims in published maps and institutional affiliations.

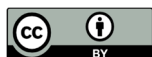

**Copyright:** © 2021 by the authors. Licensee MDPI, Basel, Switzerland. This article is an open access article distributed under the terms and conditions of the Creative Commons Attribution (CC BY) license (<http://creativecommons.org/licenses/by/4.0/>).

**Table S1.** Changes in soil water content (%) expressed on dry weight basis. (mean  $\pm$  SD, n = 4) in the field plots arranged in an olive and orange orchard under different treatments [no-tillage (NT), conventional tillage (TILL), solid anaerobic digestate amendment (DIG)] at four sampling times (from May to September) during the 2016 growing season.

|        |      | <b>Pre-Treat</b> | <b>T1</b> | <b>T2</b> | <b>T3</b> |
|--------|------|------------------|-----------|-----------|-----------|
| Olive  | NT   | 0.28             | 0.26      | 0.19      | 0.27      |
|        | TILL | 0.28             | 0.19      | 0.13      | 0.20      |
|        | DIG  | 0.29             | 0.20      | 0.14      | 0.20      |
| Orange | NT   | 0.17             | 0.18      | 0.10      | 0.21      |
|        | TILL | 0.18             | 0.14      | 0.04      | 0.14      |
|        | DIG  | 0.18             | 0.15      | 0.05      | 0.14      |
